# Supplementary material
Source: HighWire-hosted journal article supplement (https://www.cmajopen.ca/highwire/filestream/81213/field_highwire_adjunct_files/0/2017-0106-1-at.pdf)
Supplement: 2017-0106-1-at.pdf [file 2017-0106-1-at.pdf]

**Appendix 1 (as supplied by the authors):** Supplementary tables

Table S1: Resource Utilization (RU) and Cost Input Parameters

| Variables                       | Definitions and Descriptions                                                                                                                                                                                                                                                                                              | Costs<br>(2012CAN\$)   | Resource Utilization (RU)                                                                                                          |
|---------------------------------|---------------------------------------------------------------------------------------------------------------------------------------------------------------------------------------------------------------------------------------------------------------------------------------------------------------------------|------------------------|------------------------------------------------------------------------------------------------------------------------------------|
| Screening and Diagnosis         |                                                                                                                                                                                                                                                                                                                           |                        |                                                                                                                                    |
| Breast Cancer Screening program | RU: Assume all women eligible would be screened-<br>Cost: Includes mammography and radiology based on the Ontario Health Insurance Plan (OHIP) (1)                                                                                                                                                                        | \$183.00 per screen    | 100% of women eligible for screening                                                                                               |
| Non-invasive Workup             | RU: Assume all women with a positive mammogram<br>Cost: Includes mammography, radiology, physician clinic visit based on OHIP (1)                                                                                                                                                                                         | \$445.95 per work-up   | 100% of women who have a positive screening exam                                                                                   |
| Invasive Work-up- Needle Biopsy | RU: Of the women who get a non-invasive workup, 14.7% subsequently receive an invasive procedure based on the Ontario Breast Screening Program (OBSP) (2)<br>Cost: Physician clinic visit, needle biopsy procedure and pathology based on OHIP (1)                                                                        | \$745.46 per work-up   | 82.1% of women who receive an invasive work-up.                                                                                    |
| Invasive Work-up- Excisional    | RU: Of the women who get a non-invasive workup, 14.7% receive an invasive procedure based on OBSP (2);<br>Cost: physician clinic visits, excision, pathology based on OHIP (1)                                                                                                                                            | \$1,652.44 per work-up | 17.8% of women who receive an invasive work-up.                                                                                    |
| Treatment                       |                                                                                                                                                                                                                                                                                                                           |                        |                                                                                                                                    |
| Chemotherapy                    | RU: Proportion of women receiving chemotherapy;<br>Cost: Mean value of 1st, 2nd and 3rd generation chemotherapies based on expert opinion, Cancer Care Ontario (CCO) (3), and Sunnybrook Pharmacy Department (4).                                                                                                         | \$7,376.10 per course  | Women receiving chemotherapy with invasive cancer-see details below<br>Women receiving chemotherapy with DCIS=0%-see details below |
| Herceptin                       | RU: Incidence of Herceptin-assume all women who are HER2+ received Herceptin; Cost: Assume that treatment Costs are based on 8 cycles; Includes chemotherapy costs recommended for Herceptin (paclitaxel); includes health care personnel costs and physician clinic visits associated with administration. Based on ASCO | \$29,709 per course    | 14% with invasive cancer<br>0% with DCIS                                                                                           |

|                                                      |                                                                                                                                                                                                                                             |                    |                                                                                     |
|------------------------------------------------------|---------------------------------------------------------------------------------------------------------------------------------------------------------------------------------------------------------------------------------------------|--------------------|-------------------------------------------------------------------------------------|
|                                                      | abstract (5), CCO (3), and Sunnybrook Pharmacy Department (4)                                                                                                                                                                               |                    |                                                                                     |
| Tamoxifen                                            | RU: Assume utilization of tamoxifen for appropriate population over 10-year time horizon.<br>Cost: Annual cost (excludes markup+dispensing)+physician clinic visit 4 times per year. Based on the Ontario Drug Benefit Formulary (ODBF) (6) | \$383.40 per annum | 100% for invasive cancer based in eligible women<br>100% for DCIS in eligible women |
| Aromatase Inhibitors (AI)                            | RU: Assume utilization of AI for appropriate population over 10 year time horizon;<br>Cost: annual cost of letrozole (excludes markup and dispensing) + physician clinic visits 4 times per year. Based on the ODBF (6).                    | \$822.40 per annum | 100% for invasive cancer in eligible women<br>0% for DCIS                           |
| Treatment Cost per Appropriate Cohort                |                                                                                                                                                                                                                                             |                    |                                                                                     |
| ER+, <50 years, DCIS, annual cost                    | RU: Tamoxifen only (over 10 year time horizon);<br>Cost: tamoxifen only based on the ODBF (36)                                                                                                                                              | \$383.40           | 100%                                                                                |
| ER+, <50 years, Invasive, annual cost                | RU: Tamoxifen (over 10 year time horizon)+Chemotherapy;<br>Cost: tamoxifen (over 10 year time horizon)+Chemotherapy based on the ODBF (6), CCO (3), Sunnybrook Pharmacy Department (4) and expert opinion.                                  | \$7,759.50         | 100%                                                                                |
| ER+, <50 years, Invasive, annual cost with Herceptin | RU: Tamoxifen (over 10 year time horizon)+Chemotherapy+Herceptin;<br>Cost: tamoxifen (over 10 year time horizon)+Chemotherapy+Herceptin. Based on the ODBF (6), CCO (3), Sunnybrook Pharmacy Department (4), and expert opinion             | \$37,462.50        | 100%                                                                                |
| ER+, >=50 years, DCIS, annual cost                   | RU: Tamoxifen (over 10 year time horizon)+only;<br>Cost: tamoxifen only based on ODBF (4)                                                                                                                                                   | \$383.40           | 100% of women in this cohort received this regimen                                  |
| ER+, >=50 years, Invasive, annual cost               | RU: Chemotherapy+Aromatase Inhibitor (AI) (over 10 year time horizon);<br>Cost: chemotherapy+AI (over 10 year time horizon). Based on ODBF (34), CCO (3), Sunnybrook Pharmacy Department (4), and expert opinion                            | \$8,198.50         | 100% of women in this cohort received this regimen                                  |
| ER+, >= 50 years, Invasive,                          | RU: Chemotherapy+AI (over 10 year time horizon)+Herceptin;<br>Cost: Chemotherapy +AI (over 10                                                                                                                                               | \$37,901.50        | 100% of women in this cohort received this regimen                                  |

|                                                       |                                                                                                                                                                                                                         |                                               |                                                                                                                                                                                                                    |
|-------------------------------------------------------|-------------------------------------------------------------------------------------------------------------------------------------------------------------------------------------------------------------------------|-----------------------------------------------|--------------------------------------------------------------------------------------------------------------------------------------------------------------------------------------------------------------------|
| annual cost with Herceptin                            | year time horizon)+Herceptin. Based on ODBF (6), CCO (3), Sunnybrook Pharmacy Department (4), and expert opinion                                                                                                        |                                               |                                                                                                                                                                                                                    |
| ER-, <50 years, DCIS, annual cost                     | No drug therapy. Based on expert opinion.                                                                                                                                                                               | \$0                                           | 100% of women in this cohort received this regimen                                                                                                                                                                 |
| ER-, < 50 , Invasive, annual cost                     | RU: Chemotherapy; Cost: Chemotherapy. Based on ODBF(6), CCO (3), Sunnybrook Pharmacy Department (4), and expert opinion                                                                                                 | \$7,376.10                                    | 100% of women in this cohort received this regimen                                                                                                                                                                 |
| ER-, < 50 years, Invasive, annual cost with Herceptin | RU: Chemotherapy+Herceptin; Cost: Chemotherapy+Herceptin Based on ODBF (6), CCO (3), Sunnybrook Pharmacy Department (4), and expert opinion.                                                                            | \$37,079.10                                   | 100% of women in this cohort received this regimen                                                                                                                                                                 |
| ER-, >=50 years, DCIS, annual cost                    | No drug therapy. Based on expert opinion                                                                                                                                                                                | \$0                                           | 100% of women in this cohort received this regimen                                                                                                                                                                 |
| ER-, >=50 years, Invasive, annual cost                | RU: chemotherapy; Cost: chemotherapy. Based on ODBF (6), CCO (3), Sunnybrook Pharmacy Department (4), and expert opinion. Source: Cancer Care Ontario, expert opinion                                                   | \$7,376.10                                    | 100% of women in this cohort received this regimen                                                                                                                                                                 |
| ER-, >=50 years, Invasive, annual cost with Herceptin | RU: Chemotherapy+Herceptin; Cost: Chemotherapy+Herceptin Based on ODBF (6), CCO (3), Sunnybrook Pharmacy Department (4), and expert opinion.                                                                            | \$37,079.10                                   | 100% of women in this cohort received this regimen                                                                                                                                                                 |
| <b>Procedures</b>                                     |                                                                                                                                                                                                                         |                                               |                                                                                                                                                                                                                    |
| Radiation for invasive cancer                         | RU: Proportion of women with breast cancer who received radiation therapy. Based on Mittmann et al (7). Cost: 25 fractions * \$138 (1996) or 188.39 (2012). Based on Bank of Canada (8), Earle et al (9), and OHIP (1). | \$5,014.05 per radiation                      | 67%                                                                                                                                                                                                                |
| Surgery for invasive cancer                           | RU: Proportion of women with breast cancer receiving surgery based on Mittmann et al (10)                                                                                                                               | Costs stratified by lumpectomy and mastectomy | 90%                                                                                                                                                                                                                |
| Surgery-lumpectomy for invasive cancer                | RU: Proportion of all women receiving surgery; Cost: OCCI 2012. Based on Ontario Case Cost Initiative (OCCI) (11).                                                                                                      | \$4,937.06 per surgery                        | 63%<br>The joint report by the Canadian Institute for Health Information (CIHI) and the Canadian Partnership Against Cancer show the annual rates for the two treatments vary widely from one province to another. |
| Surgery-                                              | RU: Proportion of all women                                                                                                                                                                                             | \$6,956.77 per surgery                        | 37%                                                                                                                                                                                                                |

|                                |                                                                                                                                                                                           |                          |                                                                                                                                                                                                             |
|--------------------------------|-------------------------------------------------------------------------------------------------------------------------------------------------------------------------------------------|--------------------------|-------------------------------------------------------------------------------------------------------------------------------------------------------------------------------------------------------------|
| mastectomy for invasive cancer | receiving surgery<br>Cost: OCCI 2012. Based on OCCI (11).                                                                                                                                 |                          | The joint report by the Canadian Institute for Health Information (CIHI) and the Canadian Partnership Against Cancer show the annual rates for the two treatments vary widely from one province to another. |
| Radiation for DCIS             | RU: Proportion of women with DCIS who received radiation therapy<br>Cost: 25 fractions * \$138 (1996) or 188.39 (2012). Based on Bank of Canada (8), Earle et al (9), and OHIP (1)        | \$5,014.05 per radiation | 50%                                                                                                                                                                                                         |
| Surgery-lumpectomy for DCIS    | RU: Proportion of DCIS women receiving surgery. Based on expert opinion;<br>Cost: OCCI 2012. Based on OCCI (11), Canadian Institute for Health Information (CIHI) (12) and expert opinion | \$4,937.06 per surgery   | 67%                                                                                                                                                                                                         |
| Surgery-mastectomy for DCIS    | RU: Proportion of all DCIS receiving surgery<br>Cost: OCCI 2012. Based on OCCI (11), CIHI Report (12), and expert opinion                                                                 | \$6,956.77 per surgery   | 33%                                                                                                                                                                                                         |

Table S2: Values for Univariate Sensitivity Analyses

| Variable                                                     | Base Case Value                                 | Sensitivity Analysis Value | Source and Comments                                                                                                                                                                                                             |
|--------------------------------------------------------------|-------------------------------------------------|----------------------------|---------------------------------------------------------------------------------------------------------------------------------------------------------------------------------------------------------------------------------|
| Percent of women eligible for screening who missed screening | 0%                                              | 50%                        | In Ontario, 60% of women over age 50 participate in regular screening, but about 43% do this through the organized program. The retention rate for women continuing screening after a previous screen is approximately 85% (12) |
| Detection sensitivity for mammography                        | Model calibrated as per empirical data (13, 14) | 100%                       | Ideal                                                                                                                                                                                                                           |
| Herceptin                                                    | 100% of HER2+ women (14% of invasive cancers)   | 0%                         | Assumption applied to all women in model                                                                                                                                                                                        |
| Treatment                                                    | Surgery, radiation, chemo, hormonal             | Surgery, radiation only    | Assumption applied to all women in model                                                                                                                                                                                        |
| Health Preference values                                     | Values                                          | +/- 25%                    |                                                                                                                                                                                                                                 |

Table S3: Marginal Cost-effectiveness and Cost-utility of Different Screening Scenarios (discount=1.5%) from the Health System perspective compared to No Screening. Values in Columns 2—6 and 8 are per 1000 Women.

| Screening Scenario           | Modeled Overall Health System Cost | Modeled LY | Modeled QALY | Health System Incremental Cost | Incremental LY | MCER (\$/LYG) | Incremental QALY | MCUR (\$/QALY) |
|------------------------------|------------------------------------|------------|--------------|--------------------------------|----------------|---------------|------------------|----------------|
| No Screening                 | \$1,965,899                        | 30,602     | 24,998       |                                |                |               |                  |                |
| Triennial 50-69              | \$3,368,225                        | 30,648     | 25,036       | \$1,402,326                    | 46             | \$30,536      | 38               | \$36,981       |
| Triennial 50-74              | \$3,642,494                        | 30,653     | 25,039       | \$1,676,595                    | 51             | \$33,026      | 42               | \$40,193       |
| Biennial 50-69               | \$3,835,726                        | 30,662     | 25,048       | \$1,869,827                    | 61             | \$30,879      | 50               | \$37,265       |
| Biennial 50-74               | \$4,217,275                        | 30,669     | 25,053       | \$2,251,376                    | 67             | \$33,715      | 55               | \$40,851       |
| Annual 50-69                 | \$5,250,458                        | 30,688     | 25,069       | \$3,284,559                    | 86             | \$38,366      | 72               | \$45,855       |
| Annual 40-49                 | \$4,310,198                        | 30,639     | 25,030       | \$2,344,299                    | 37             | \$63,167      | 32               | \$73,414       |
| Annual 50-74                 | \$5,789,126                        | 30,694     | 25,075       | \$3,823,227                    | 93             | \$41,313      | 77               | \$49,587       |
| Annual 40-49, Biennial 50-69 | \$6,072,758                        | 30,697     | 25,078       | \$4,106,859                    | 95             | \$43,419      | 80               | \$51,442       |
| Annual 40-49, Biennial 50-74 | \$6,444,999                        | 30,703     | 25,083       | \$4,479,099                    | 101            | \$44,221      | 85               | \$52,603       |
| Annual 40-69                 | \$7,516,630                        | 30,721     | 25,098       | \$5,550,731                    | 119            | \$46,705      | 100              | \$55,386       |
| Annual 40-74                 | \$8,051,766                        | 30,727     | 25,103       | \$6,085,867                    | 125            | \$48,718      | 105              | \$57,938       |

Table S4: Univariate sensitivity analysis -marginal: Health system perspective- screening scenarios compared to No Screening where the outcomes are cost per life year gained (LYG) and cost per quality adjusted life year (QALY) (discount=1.5%).

| Screening Scenario                                                 | Basecase | No Treatment | 50% Missed Screens | 100% Sensitivity | No Herceptin | Utilities +25% | Utilities - 25% |
|--------------------------------------------------------------------|----------|--------------|--------------------|------------------|--------------|----------------|-----------------|
| <b>Marginal Cost Effectiveness Ratios relative to no screening</b> |          |              |                    |                  |              |                |                 |
| No Screening                                                       |          |              |                    |                  |              |                |                 |
| Triennial 50-69                                                    | \$30,536 | \$110,230    | \$27,950           | \$23,082         | \$27,805     |                |                 |
| Triennial 50-74                                                    | \$33,026 | \$116,482    | \$30,899           | \$25,258         | \$30,372     |                |                 |
| Biennial 50-69                                                     | \$30,879 | \$147,828    | \$27,799           | \$22,509         | \$28,331     |                |                 |
| Biennial 50-74                                                     | \$33,715 | \$144,336    | \$30,823           | \$24,931         | \$31,025     |                |                 |
| Annual 50-69                                                       | \$38,366 | \$183,315    | \$31,047           | \$29,224         | \$36,544     |                |                 |
| Annual 40-49                                                       | \$63,167 | \$870,149    | \$51,162           | \$65,828         | \$56,557     |                |                 |
| Annual 50-74                                                       | \$41,313 | \$197,039    | \$34,192           | \$20,854         | \$39,533     |                |                 |
| Annual 40-49, Biennial 50-69                                       | \$43,419 | \$268,022    | \$36,801           | \$31,387         | \$40,072     |                |                 |
| Annual 40-49, Biennial 50-74                                       | \$44,221 | \$260,950    | \$38,069           | \$32,310         | \$40,828     |                |                 |
| Annual 40-69                                                       | \$46,705 | \$267,191    | \$37,596           | \$34,880         | \$43,894     |                |                 |
| Annual 40-74                                                       | \$48,718 | \$289,120    | \$39,324           | \$36,370         | \$45,798     |                |                 |
| <b>Marginal Cost Utility Ratios</b>                                |          |              |                    |                  |              |                |                 |
| No Screening                                                       |          |              |                    |                  |              |                |                 |
| Triennial 50-69                                                    | \$36,981 | \$165,119    | \$33,327           | \$27,487         | \$33,035     | \$29,585       | \$46,227        |
| Triennial 50-74                                                    | \$40,193 | \$179,359    | \$36,920           | \$30,283         | \$36,243     | \$32,154       | \$50,241        |
| Biennial 50-69                                                     | \$37,265 | \$207,737    | \$32,768           | \$26,606         | \$33,498     | \$29,812       | \$46,581        |
| Biennial 50-74                                                     | \$40,851 | \$205,444    | \$36,442           | \$29,581         | \$36,848     | \$32,681       | \$51,064        |
| Annual 50-69                                                       | \$45,855 | \$247,211    | \$36,556           | \$34,224         | \$42,836     | \$36,684       | \$57,318        |

|                                 |          |             |          |          |          |          |          |
|---------------------------------|----------|-------------|----------|----------|----------|----------|----------|
| Annual 40-49                    | \$73,414 | \$1,248,787 | \$58,199 | \$75,173 | \$64,669 | \$58,731 | \$91,767 |
| Annual 50-74                    | \$49,587 | \$276,755   | \$40,447 | \$24,491 | \$46,545 | \$39,669 | \$61,983 |
| Annual 40-49,<br>Biennial 50-69 | \$51,442 | \$373,350   | \$42,949 | \$36,529 | \$46,656 | \$41,153 | \$64,302 |
| Annual 40-49,<br>Biennial 50-74 | \$52,603 | \$371,187   | \$44,603 | \$37,739 | \$47,731 | \$42,082 | \$65,753 |
| Annual 40-69                    | \$55,386 | \$370,904   | \$43,883 | \$40,491 | \$51,114 | \$44,309 | \$69,232 |
| Annual 40-74                    | \$57,938 | \$415,165   | \$46,069 | \$42,313 | \$53,467 | \$46,351 | \$72,423 |



Table S5: Incremental cost-effectiveness analysis. Shaded rows indicate weakly dominated (W. Dom) scenarios which have been removed in the lower part of the table.

| Screening Scenario           | Modeled Overall Health System Cost | Modeled LY | Modeled QALY | Health System Incremental Cost | Incremental LY | ICER (\$/LYG) | Incremental QALY | ICUR (\$/QALY) |
|------------------------------|------------------------------------|------------|--------------|--------------------------------|----------------|---------------|------------------|----------------|
| No Screening                 | \$1,965,899                        | 30,602     | 24,998       |                                |                |               |                  |                |
| Triennial 50-69              | \$3,368,225                        | 30,648     | 25,036       | \$1,402,326                    | 46             | \$30,536      | 38               | \$36,981       |
| Triennial 50-74              | \$3,642,494                        | 30,653     | 25,039       | \$274,269                      |                | W. Dom        |                  | W. Dom         |
| Biennial 50-69               | \$3,835,726                        | 30,662     | 25,048       | \$467,501                      | 15             | \$31,958      | 12               | \$38,142       |
| Biennial 50-74               | \$4,217,275                        | 30,669     | 25,053       | \$381,549                      |                | W. Dom        |                  | Dom            |
| Annual 50-69                 | \$5,250,458                        | 30,688     | 25,069       | \$1,414,732                    | 25             | \$56,460      | 21               | \$65,944       |
| Annual 50-74                 | \$5,789,126                        | 30,694     | 25,075       | \$538,668                      |                | W. Dom        |                  | W. Dom         |
| Annual 40-49, Biennial 50-69 | \$6,072,758                        | 30,697     | 25,078       | \$283,631                      |                | W. Dom        |                  | W. Dom         |
| Annual 40-49, Biennial 50-74 | \$6,444,999                        | 30,703     | 25,083       | \$372,241                      |                | W. Dom        |                  | W. Dom         |
| Annual 40-69                 | \$7,516,630                        | 30,721     | 25,098       | \$2,266,172                    | 33             | \$68,164      | 29               | \$79,266       |
| Annual 40-74                 | \$8,051,766                        | 30,727     | 25,103       | \$535,136                      | 6              | \$88,088      | 5                | \$110,994      |

Table S6: ICUR and ICER for changes in screening frequency and age to start screening

| Screening Scenario                    | Modeled Overall Health System Cost | Modeled LY | Modeled QALY | Health System Incremental Cost | Incremental LY | ICER (\$/LYG) | Incremental QALY | ICUR (\$/QALY) |
|---------------------------------------|------------------------------------|------------|--------------|--------------------------------|----------------|---------------|------------------|----------------|
| <b>Increasing Screening Frequency</b> |                                    |            |              |                                |                |               |                  |                |
| Triennial 50-74                       | \$3,642,494                        | 30,653     | 25,039       |                                |                |               |                  |                |
| Biennial 50-74                        | \$4,217,275                        | 30,669     | 25,053       | \$574,781                      | 16             | \$35,899      | 13               | \$42,900       |
| Annual 50-74                          | \$5,789,126                        | 30,694     | 25,075       | \$1,571,851                    | 26             | \$61,006      | 22               | \$71,481       |
| <b>Screening Younger Women</b>        |                                    |            |              |                                |                |               |                  |                |
| Annual 50-74                          | \$5,789,126                        | 30,694     | 25,075       |                                |                |               |                  |                |
| Annual 40-74                          | \$8,051,766                        | 30,727     | 25,103       | \$2,262,640                    | 32             | \$69,882      | 28               | \$80,986       |
|                                       |                                    |            |              |                                |                |               |                  |                |
| Annual 50-69                          | \$5,250,458                        | 30,688     | 25,069       |                                |                |               |                  |                |
| Annual 40-69                          | \$7,516,630                        | 30,721     | 25,098       | \$2,266,172                    | 33             | \$68,184      | 29               | \$79,266       |
|                                       |                                    |            |              |                                |                |               |                  |                |
| Biennial 50-74                        | \$4,217,275                        | 30,669     | 25,053       |                                |                |               |                  |                |
| Annual 40-49, Biennial 50-74          | \$6,444,999                        | 30,703     | 25,083       | \$2,227,723                    | 35             | \$64,551      | 30               | \$74,164       |

Table S7: Effect of changing the screening scenario from the baseline of biennial screening from 50-74. The upper part of the table considers scenarios where screening is increased from the baseline. In the lower part screening has been decreased from the baseline and the ICERS and ICURS express dollars saved per LY or QALY lost. Shaded rows indicate weakly dominated (W. Dom) scenarios.

| Screening Scenario                   | Modeled Overall Health System Cost | Modeled LY | Modeled QALY | Health System Incremental Cost | Incremental LY | ICER (\$/LY) | Incremental QALY | ICUR (\$/QALY) |
|--------------------------------------|------------------------------------|------------|--------------|--------------------------------|----------------|--------------|------------------|----------------|
| <b>Increasing</b>                    |                                    |            |              |                                |                |              |                  |                |
| Digital Biennial 50-74               | \$4,217,275                        | 30,669     | 25,053       |                                |                |              |                  |                |
| Digital Annual 50-69                 | \$5,250,458                        | 30,688     | 25,069       | \$1,033,183                    | 19             | \$54,862     | 17               | \$62,549       |
| Digital Annual 50-74                 | \$5,789,126                        | 30,694     | 25,075       |                                |                | W. Dom       |                  |                |
| Digital Annual 40-49, Biennial 50-69 | \$6,072,758                        | 30,697     | 25,078       |                                |                | W. Dom       |                  |                |
| Digital Annual 40-49, Biennial 50-74 | \$6,444,999                        | 30,703     | 25,083       |                                |                | W. Dom       |                  |                |
| Digital Annual 40-69                 | \$7,516,630                        | 30,721     | 25,098       | \$2,266,172                    | 33             | \$68,184     | 29               | \$79,266       |
| Digital Annual 40-74                 | \$8,051,766                        | 30,727     | 25,103       | \$535,136                      | 6              | \$88,088     | 5                | \$110,994      |
|                                      |                                    |            |              |                                |                |              |                  |                |
| <b>Decreasing</b>                    |                                    |            |              |                                |                |              |                  |                |
|                                      |                                    |            |              |                                |                |              |                  |                |
| Digital Biennial 50-74               | \$4,217,275                        | 30,669     | 25,053       |                                |                |              |                  |                |
| Digital Biennial 50-69               | \$3,835,726                        | 30,662     | 25,048       | \$381,549                      | 6              | \$61,296     | 5                | \$77,307.62    |
| Digital Triennial 50-74              | \$3,642,494                        | 30,653     | 25,039       |                                |                | W. Dom       |                  | W. Dom         |
| Digital Triennial 50-69              | \$3,368,225                        | 30,648     | 25,036       | \$467,501                      | 15             | \$31,958     | 12               | \$38,142       |
| No Screening                         | \$1,965,899                        | 30,602     | 24,998       | \$1,402,326                    | 46             | \$30,536     | 38               | \$36,981       |

## References for the Appendix

1. Ministry of Health and Long-Term Care. Schedule of benefits for Physician Services Act under the Health Insurance Act. May 1, 2014.  
Available from:  
[http://www.health.gov.on.ca/english/providers/program/ohip/sob/physserv/physserv\\_mn.html](http://www.health.gov.on.ca/english/providers/program/ohip/sob/physserv/physserv_mn.html). [Accessed 9 July, 2014].
2. Cancer Care Ontario. Ontario Breast Screening Program 20<sup>th</sup> Anniversary Report 1990-2010. Available from:  
<https://www.cancercare.on.ca/pcs/screening/breastscreening/>. [Accessed 9 July, 2014].
3. Cancer Care Ontario. Accessible from:<https://www.cancercare.on.ca/>. [Accessed 9 July 2014].
4. Sunnybrook Pharmacy Department [Internal resource].
5. [http://www.asco.org/ASCOv2/Meetings/Abstracts?&vmview=abst\\_detail\\_view&confID=74&abstractID=49264](http://www.asco.org/ASCOv2/Meetings/Abstracts?&vmview=abst_detail_view&confID=74&abstractID=49264)
6. Ministry of Health and Long-Term Care. Ontario Drug Benefit Formulary Search. Available from:  
<https://www.healthinfo.moh.gov.on.ca/formulary/SearchServlet>. [Accessed 7 July 2014].
7. Mittmann N, Porter JM, Rangrej J et al. Health system costs for stage-specific breast cancer: A population-based approach. *Current Oncology* 2014; 21(6):281-293.

8. Bank of Canada Inflation Calculator. Accessible from:  
<http://www.bankofcanada.ca/rates/related/inflation-calculator/> [Accessed 7 July 2014].
9. Earle CC, Chapman RH, Baker CS et al. Systematic overview of cost-utility assessments in oncology. *J Clin Oncol* 2000;18(18):3302-17.
10. Mittmann N, Isogai PK, Saskin R, et al. Population-based home care services in breast cancer: resources and costs. *Current Oncology* 2012; 19(6): e383-391.
11. Ontario Case Costing Initiative. OCCI Costing Analysis Tool. Available from: <https://hsimi.ca/occp/occpreports/> [Accessed 9 July, 2014].
12. Cancer Care Ontario. Ontario Breast Screening Program 2011 Report. Toronto, Canada, 2013. Available from: [www.cancercare.on.ca/breastreport](http://www.cancercare.on.ca/breastreport). [Accessed 9 July 2014].
13. Healthcare Delivery Research Program. Breast Cancer Surveillance Consortium (BCSC). Available from: <http://breastscreening.cancer.gov/>. [Accessed 9 July 2014].
14. British Columbia Cancer Agency. Screening Mammography Program 2012 Annual Report. Available from:  
[http://www.bccancer.bc.ca/screening/Documents/SMP\\_Report-AnnualReport2012.pdf](http://www.bccancer.bc.ca/screening/Documents/SMP_Report-AnnualReport2012.pdf). [Accessed 9 July 2014].
